# Supplementary material for: Selective alkane hydroxylation and alkene epoxidation using H2O2 and Fe(ii) catalysts electrostatically attached to a fluorinated surface
Source: Royal Society of Chemistry journal article supplement (doi:10.1039/d2cc06998a), 2023-01-01
Supplement: d2cc06998a1.pdf [file d2cc06998a1.pdf]

## Electronic supplementary information

for

### Selective alkane hydroxylation and alkene epoxidation using H<sub>2</sub>O<sub>2</sub> and Fe(II) catalysts electrostatically attached on fluorinated surface

Hiroto Fujisaki,<sup>a</sup> Masaya Okamura,<sup>b</sup> Shiro Hikichi,<sup>\*b,c</sup> and Takahiko Kojima <sup>\*a,c</sup>

<sup>a</sup>*Department of Chemistry, Faculty of Pure and Applied Sciences, University of Tsukuba, 1-1-1 Tennoudai, Tsukuba, Ibaraki 305-8571, Japan.*

<sup>b</sup>*Department of Material and Life Chemistry, Faculty of Engineering, Kanagawa University, 3-27-1 Rokkakubashi, Kanagawa-ku, Yokohama, Kanagawa 221-8686, Japan.*

<sup>c</sup>*CREST, Japan Science and Technology Agency (JST).*

1. **General**
2. **Synthesis**
3. **Measurements**
4. **Supplementary Figures**
5. **Supplementary Tables**

## 1. General.

NMR measurements were performed on Bruker AVANCE 400 and DPX 400 spectrometers. Gas chromatography-mass (GC-MS) measurements were performed using a Shimadzu GC-2010 Plus equipped with a Shimadzu GCMS-QP2020 and an Agilent DB-Wax UI capillary column (30 meters, ID 0.25 mm, DF 0.25  $\mu$ m). ESI-TOF-MS spectra were obtained on a JEOL JMS-T100CS mass spectrometer. UV-vis-NIR reflectance spectra were measured on a Jasco UV-780 spectrophotometer at room temperature with an integrating sphere for solid samples. UV-Vis absorption spectra were measured on a Shimadzu UV-2450 spectrophotometer at room temperature. Nitrogen sorption/desorption studies were performed at liquid nitrogen temperature (77K) using Microtrac BELSORP MINI X. Before the adsorption experiments, the samples were outgassed under reduced pressure for 3 h at 333 K. Inductively coupled plasma mass spectrometry (ICP-MS) was performed on Agilent Technologies 7700 Series ICP-MS. Thermogravimetric analysis was performed on Rigaku Thermo plus EVO. Contact angle measurements were performed on Excimer SImage AUTO 100. Electrospray-ionization time-of-flight mass spectrometry (ESI-TOF-MS) measurements were made on a JEOL JMS-T100CS mass spectrometer. ESR spectroscopy was performed on a Bruker BioSpin EMXPlus 9.5/2.7 spectrometer.

Chemicals and solvents were used as received from Tokyo Chemical Industry (TCI) Co., FUJIFILM Wako Pure Chemical Corp., Nacalai Tesque or Sigma-Aldrich Corp., unless otherwise mentioned. All syntheses were performed under Ar atmosphere.

b

## 2. Synthesis.

**1,3-dihydro-1,3-bis(2-pyridyl)methyl-2H-benzimidazolium bromide (PY<sub>4</sub>H<sub>2</sub>BIm-H•Br).** 1,3-*N,N'*-bis(di-pyridylmethyl)-phenylenediamine (PY<sub>4</sub>H<sub>2</sub>BDA) was synthesized as a precursor according to the literature procedure.<sup>51</sup> A solution of 1,2-phenylenediamine (200 mg, 1.9 mmol), di-2-pyridylketone (818 mg, 2.4 mmol) and *N,N,N',N'*-tetramethyl-ethylenediamine (2.0 mL, 14 mmol) in toluene (10 mL) was heated at 80 °C for 30 min. TiCl<sub>4</sub> (400  $\mu$ L, 3.4 mmol) was then added dropwise over 20 min, during the temperature was raised to 110 °C in an oil bath. After stirring at the temperature for 1 d, the reaction mixture was cooled to R.T. and filtered through a Celite pad to remove insoluble materials. The solids on the Celite pad were washed well with AcOEt (30 mL) and then CH<sub>2</sub>Cl<sub>2</sub> (30 mL), and the combined filtrate was evaporated to dryness. NaBH<sub>4</sub> (300 mg, 7.8 mmol) and dry EtOH (20 mL) were added to the residue and the reaction mixture was stirred at R.T. for 18 h in the dark. After addition of distilled water (50 mL) to quench unreacted NaBH<sub>4</sub>, the reaction mixture was stirred at R.T. for several hours. Then, CH<sub>2</sub>Cl<sub>2</sub> (25 mL) and distilled water (25 mL) were added to the reaction mixture. The organic layer was separated, washed with water (30 mL) three times, dried over Na<sub>2</sub>SO<sub>4</sub>. By removing the volatile using a rotary evaporator under reduced pressure, crude PY<sub>4</sub>H<sub>2</sub>BDA was obtained and used for the next reaction without purification. The crude PY<sub>4</sub>H<sub>2</sub>BDA was dissolved into CH(OMe)<sub>3</sub> (15 mL, 137 mmol), and NH<sub>4</sub>PF<sub>6</sub> (0.52 g, 3.19 mmol) in MeOH (5 mL) and a drop of 12 M HCl were added to the solution. The reaction mixture was stirred at 40 °C for 24 h in the dark. After neutralization by adding a saturated aqueous solution of NaHCO<sub>3</sub>, CH<sub>2</sub>Cl<sub>2</sub> (15 mL) and distilled water (30 mL) were added to the reaction mixture. The organic layer was separated, washed with water (30 mL) three times, dried over Na<sub>2</sub>SO<sub>4</sub>, and then the volatile was evaporated under reduced pressure. The crude mixture obtained was dissolved into MeCN/AcOEt (1:1, v/v) (5 mL), and the solution of TBABr (1.6 g, 5.0 mmol) in MeCN/AcOEt (1:1, v/v) was added.

After stirring for 1 h, the reaction mixture was filtered through membrane to obtain white-yellow crystals (750 mg, 1.40 mmol) of **PY<sub>4</sub>H<sub>2</sub>BIm-H•Br** in 73% yield for the three steps. <sup>1</sup>H NMR (dms<sub>o</sub>-d<sub>6</sub>): δ 7.49 (dd, *J* = 8, 5 Hz, 4H), 7.68–7.74 (m, 2H), 7.72 (d, *J* = 8 Hz, 4H), 7.98 (s, 4H), 8.00 (td, *J* = 8, 1 Hz, 4H), 8.17–8.23 (m, 4H), 8.55 (dd, *J* = 5, 1 Hz, 4H), 10.60 (s, 1H). ESI-TOF-MS: *m/z* = 455.12 (sim for [M – Br]<sup>+</sup>: *m/z* = 455.20).

**[Fe<sup>II</sup>(PY<sub>4</sub>H<sub>2</sub>BIm)(MeCN)](PF<sub>6</sub>)<sub>2</sub> (Fe<sup>II</sup>-<sup>H</sup>NHC•(PF<sub>6</sub>)<sub>2</sub>)**. To a suspension of iron(II) acetate (100 mg, 0.57 mmol) in DMSO (3.0 mL), <sup>H</sup>NHC-H•Br (50 mg, 0.093 mmol) was added and the mixture was stirred at 50 °C for 24 h in the dark. After addition of KPF<sub>6</sub> (351 mg, 1.9 mmol) and distilled water (20 mL), the reaction mixture was filtered through membrane to obtain red solid. The crude product was recrystallized from MeCN/Et<sub>2</sub>O and pale-red crystals of Fe-<sup>H</sup>NHC (50 mg, 0.059 mmol) were obtained in 64% yield. <sup>1</sup>H NMR (CD<sub>3</sub>CN): δ 7.35 (dd, *J* = 8, 5 Hz, 4H), 7.50–7.53 (m, 2H), 7.67 (s, 4H), 7.82 (td, *J* = 8, 1 Hz, 4H), 7.89 (d, *J* = 8 Hz, 4H), 8.08–8.14 (m, 4H), 9.44 (dd, *J* = 5, 1 Hz, 4H). UV-Vis: λ<sub>max</sub> [nm] = 310, 390, 450. ESI-TOF-MS: *m/z* = 275.49 (sim for [M – 2PF<sub>6</sub>]<sup>2+</sup>: *m/z* = 275.57). Anal. Calcd. for C<sub>31</sub>H<sub>25</sub>N<sub>7</sub>Fe•2PF<sub>6</sub>•5H<sub>2</sub>O: H 3.79, C 39.97, N 10.53; Found: H 3.91, C 39.72, N 10.58.

**5,6-dimethyl-1,3-dihydro-1,3-bis(2-pyridyl)methyl-2H-benzimidazolium bromide (PY<sub>4</sub>Me<sub>2</sub>BIm-H•Br)**. 1,3-*N,N'*-bis(di-pyridylmethyl)-5,6-dimethylphenylenediamine (PY<sub>4</sub>Me<sub>2</sub>BDA) was synthesized as a precursor according to the literature procedure.<sup>51</sup> A solution of 5,6-dimethyl-1,2-phenylenediamine (370 mg, 2.7 mmol), di-2-pyridylketone (1.04 g, 5.63 mmol) and *N,N,N',N'*-tetramethyl-ethylenediamine (4.0 mL, 28 mmol) in toluene (20 mL) was heated at 80 °C for 30 min. TiCl<sub>4</sub> (800 μL, 6.8 mmol) was then added dropwise over 20 min, during the temperature was raised to 110 °C in an oil bath. After stirring at the temperature for 1 d, the reaction mixture was cooled to R.T. and filtered through a Celite pad to remove insoluble materials. The solids on the Celite pad were washed well with AcOEt (30 mL) and CH<sub>2</sub>Cl<sub>2</sub> (30 mL), and the combined filtrate was concentrated to dryness. NaBH<sub>4</sub> (600 mg, 15 mmol) and dry EtOH (20 mL) were added to the residue and the reaction mixture was stirred at R.T. for 18 h in the dark. After addition of distilled water (50 mL) to quench unreacted NaBH<sub>4</sub>, the reaction mixture was stirred at R.T. for several hours. Then, CH<sub>2</sub>Cl<sub>2</sub> (25 mL) and distilled water (25 mL) were added to the reaction mixture. The organic layer was separated, washed with water (30 mL) three times, dried over Na<sub>2</sub>SO<sub>4</sub>. By removing the volatile using a rotary evaporator under reduced pressure, crude PY<sub>4</sub>Me<sub>2</sub>BDA was obtained and used for the next reaction without purification. The crude PY<sub>4</sub>Me<sub>2</sub>BDA was dissolved into CH(OMe)<sub>3</sub> (15 mL, 137 mmol), and NH<sub>4</sub>PF<sub>6</sub> (0.52 g, 3.19 mmol) in MeOH (5 mL) and a drop of 12 M HCl were added to the solution. The reaction mixture was stirred at 40 °C for 24 h in the dark. After neutralization by adding a saturated aqueous solution of NaHCO<sub>3</sub>, CH<sub>2</sub>Cl<sub>2</sub> (15 mL) and distilled water (30 mL) were added to the reaction mixture. The organic layer was separated, washed with water (30 mL) three times, dried over Na<sub>2</sub>SO<sub>4</sub>, and then the volatile was evaporated under reduced pressure. The crude mixture obtained was dissolved into MeCN/AcOEt (1:1, v/v) (5 mL), and the solution of TBABr (1.6 g, 5.0 mmol) in MeCN/AcOEt (1:1, v/v) was added. After stirring for an hour, the reaction mixture was filtered through membrane to obtain white-yellow crystals (820 mg, 1.46 mmol) of **PY<sub>4</sub>Me<sub>2</sub>BIm-H•Br** in 54% yield for the three steps. <sup>1</sup>H NMR (CD<sub>3</sub>CN): δ 2.39 (s, 6H), 7.48 (dd, *J* = 8, 5 Hz, 4H), 7.70 (d, *J* = 8 Hz, 4H), 7.88 (s, 2H), 7.98 (s, 2H), 7.99 (td, *J* = 8, 1 Hz, 4H), 8.62 (dd, *J* = 5, 1 Hz, 4H), 10.44 (s, 1H). ESI-TOF-MS: *m/z* = 483.12 (sim for [M – Br]<sup>+</sup>: *m/z* = 483.23).

**[Fe<sup>II</sup>(PY<sub>4</sub>Me<sub>2</sub>BIm)(MeCN)](PF<sub>6</sub>)<sub>2</sub> (Fe<sup>II</sup>-<sup>Me</sup>NHC•(PF<sub>6</sub>)<sub>2</sub>)**. To a suspension of iron(II) acetate (100 mg, 0.57 mmol) in DMSO (3.0 mL), <sup>Me</sup>NHC-H•Br (50 mg, 0.089 mmol) was added and the mixture was stirred at 50 °C for 24 h in the dark. After addition of KPF<sub>6</sub> (351 mg, 1.9 mmol) and distilled water (20 mL), the reaction mixture was filtered through membrane to obtain red solid. The crude product was recrystallized from MeCN/Et<sub>2</sub>O and pale-red crystals of **Fe<sup>H</sup>NHC** (50 mg, 0.059 mmol) were obtained in 64% yield. <sup>1</sup>H NMR (CD<sub>3</sub>CN): δ 2.50 (s, 6H), 7.34 (dd, *J* = 8, 5 Hz, 4H), 7.58 (s, 2H), 7.81 (td, *J* = 8, 1 Hz, 4H), 7.88 (td, *J* = 8, 1 Hz, 4H), 7.90 (s, 2H), 9.44 (dd, *J* = 5, 1 Hz, 4H). UV-Vis: λ<sub>max</sub> [nm] = 316, 390, 452. ESI-TOF-MS: *m/z* = 309.49 (sim for [M - 2PF<sub>6</sub>]<sup>2+</sup>: *m/z* = 309.54). Anal. Calcd. for C<sub>33</sub>H<sub>29</sub>N<sub>7</sub>Fe•2PF<sub>6</sub>•3H<sub>2</sub>O: H 3.82, C 42.92, N 10.62; Found: H 3.91, C 42.62, N 10.58.

#### *Preparation of aluminosilicates*

**SBA-15 type aluminosilicate (Al-SBA-15)**. SBA-15 type mesoporous aluminosilicate support, Al-SBA-15, was prepared according to the procedure reported by Krishana and Selvam with some modifications.<sup>52</sup> In a flask, 3.0 g of the surfactant Pluronic P123 (triblock copolymer EO<sub>20</sub>PO<sub>70</sub>EO<sub>20</sub> where EO = poly(ethylene oxide) and PO = poly(propylene oxide)) was dissolved in 112.5 mL of aqueous HCl solution (pH 1.5) and the resulting solution was stirred at ambient condition for 3h. In another flask, the ammonium salt of a trinuclear aluminum citrate complex<sup>53</sup> ((NH<sub>4</sub>)<sub>5</sub>[Al<sub>3</sub>(C<sub>6</sub>H<sub>4</sub>O<sub>7</sub>)<sub>3</sub>(OH)(H<sub>2</sub>O)](NO<sub>3</sub>)•6H<sub>2</sub>O; 0.69 g, 0.74 mmol) was dissolved in 7.5 mL of aqueous HCl solution (pH 1.5) and the resulting solution was stirred for 3 h. This aluminum complex solution was added to the surfactant solution. With a stirring of the mixture, 6.9 mL of Si(OEt)<sub>4</sub> (30.8 mmol) was added. After stirring at 40 °C for 20 h, the resulting mixture was sealed into an autoclave and left to stand at 100 °C for 24 h. Once cooled, the solid product was filtered and washed with water and ethanol. The P123 surfactant was removed by calcination at 550 °C for 5 h. The resulting white solid (1.81 g yield) was identified as the desired SBA-15 type mesoporous aluminosilicate, namely Al-SBA, based on its physicochemical property determined by N<sub>2</sub> isotherm measurement (BET surface area: 1236 m<sup>2</sup> g<sup>-1</sup>, Average pore diameter: 4.79 nm, Pore volume: 1.48 cm<sup>3</sup> g<sup>-1</sup>). The content of aluminum determined by ICP-MS was 0.125 mmol g<sup>-1</sup>.

**Hydrophobized SBA-15 type aluminosilicate (H<sup>+</sup>@Al<sup>F</sup>)**. The hydrophobic support was obtained by the reaction of Al-SBA-15 with fluoroalkyl silanol ester. To the suspension of Al-SBA-15 (0.60 g) in non-distilled toluene (30 mL), triethoxy-1*H*,1*H*,2*H*,2*H*-tridecafluoro-*n*-octylsilane ((C<sub>8</sub>H<sub>4</sub>F<sub>13</sub>)Si(OEt)<sub>3</sub>; 0.28 mL; 0.72 mmol) was added and stirred at 90 °C for 30 min. Filtration and then washing with toluene, methanol, and dichloromethane (each 20 mL) yielded the white powder of **H<sup>+</sup>@Al<sup>F</sup>** (1.15 g). The loading amount of the fluoroalkyl group was 0.62 mmol g<sup>-1</sup> determined by TG analysis.

#### *Preparation of Fe<sup>II-R</sup>NHC@Al<sup>F</sup> (R = Cl, H, Me)*

**[Fe<sup>II</sup>(PY<sub>4</sub>Cl<sub>2</sub>BIm)(MeCN)]<sup>2+</sup>@Al<sup>F</sup> (Fe<sup>II-Cl</sup>NHC@Al<sup>F</sup>)**. In a 100 mL round neck-flask, 50 mg of Al<sup>F</sup> and 7.8 mg of Fe<sup>II-Cl</sup>NHC•(PF<sub>6</sub>)<sub>2</sub> were placed and then 20 mL of CH<sub>3</sub>CN was added. The resulting suspension was stirred at 80 °C for 12 hours. The solid product was filtered and washed with CH<sub>3</sub>CN, CH<sub>2</sub>Cl<sub>2</sub>, CH<sub>3</sub>OH and toluene. After washing CH<sub>3</sub>CN with sonication for 15 min, the resulting pale-yellow solid was filtered and dried under vacuum to obtain 50 mg of **Fe<sup>II-Cl</sup>NHC@Al<sup>F</sup>**.

**[Fe<sup>II</sup>(PY<sub>4</sub>H<sub>2</sub>BIm)(MeCN)]<sup>2+</sup>@Al<sup>F</sup> (Fe<sup>II</sup>-<sup>H</sup>NHC@Al<sup>F</sup>)**. In a 100 mL round neck-flask, 50 mg of Al<sup>F</sup> and 6.0 mg of Fe<sup>II</sup>-<sup>H</sup>NHC•(PF<sub>6</sub>)<sub>2</sub> were placed and then 20 mL of CH<sub>3</sub>CN was added. The resulting suspension was stirred at 80 °C for 12 hours. The solid product was filtered and washed with CH<sub>3</sub>CN, CH<sub>2</sub>Cl<sub>2</sub>, CH<sub>3</sub>OH and toluene. After washing CH<sub>3</sub>CN with sonication for 15 min, the resulting pale-yellow solid was filtered and dried under vacuum to afford 50 mg of Fe<sup>II</sup>-<sup>H</sup>NHC@Al<sup>F</sup>.

**[Fe<sup>II</sup>(PYMeI<sub>2</sub>BIm)(MeCN)]<sup>2+</sup>@Al<sup>F</sup> (Fe<sup>II</sup>-<sup>Me</sup>NHC@Al<sup>F</sup>)**. In a 100 mL round neck-flask, 50 mg of Al<sup>F</sup> and 9.4 mg of Fe<sup>II</sup>-<sup>Me</sup>NHC•(PF<sub>6</sub>)<sub>2</sub> were placed and then 20 mL of CH<sub>3</sub>CN was added. The resulting suspension was stirred at 80 °C for 12 hours. The solid product was filtered and washed with CH<sub>3</sub>CN, CH<sub>2</sub>Cl<sub>2</sub>, CH<sub>3</sub>OH and toluene. After washing CH<sub>3</sub>CN with sonication for 15 min, the resulting pale-yellow solid was filtered and dried under vacuum to obtain 50 mg of Fe<sup>II</sup>-<sup>Me</sup>NHC@Al<sup>F</sup>.

### 3. Measurements.

**Determination of loading amounts of Fe catalysts on Al<sup>F</sup>**. The loading amount of Fe catalysts was quantified by <sup>1</sup>H NMR spectroscopy. Fe-<sup>R</sup>NHC@Al<sup>F</sup> (*ca.* 10 mg) and a pellet of NaOH were dissolved in 1 mL D<sub>2</sub>O with heating for several hours.<sup>S4</sup> Subsequently, a solution of sodium 3-(trimethylsilyl)propanesulfonate (0.2 mmol in 300 mL of D<sub>2</sub>O) was added to the reaction mixture (300 mL) as an internal standard. The loading amount of Fe catalysts was calculated by the integration ratio of the 2-H protons of pyridine moieties of the Fe catalysts to trimethyl protons of DSS. Then, the loading amounts of Fe complexes on Al<sup>F</sup> for Fe<sup>II</sup>-<sup>Cl</sup>NHC@Al<sup>F</sup>, Fe<sup>II</sup>-<sup>H</sup>NHC@Al<sup>F</sup> and Fe<sup>II</sup>-<sup>Me</sup>NHC@Al<sup>F</sup> were calculated to be 7.3, 16, 23 nmol mg<sup>-1</sup>, respectively.

**Catalytic reaction.** Typical reaction procedure is as follows: In a 3 mL grass tube, Fe<sup>II</sup>-<sup>R</sup>NHC@Al<sup>F</sup> catalyst ([Fe] = 0.01 mM) was suspended in 1 mL of MeCN. Cyclohexene (10 μL, 100 mM), and 30 wt % aqueous H<sub>2</sub>O<sub>2</sub> (20 μL, 16 mM) were added to this suspension and the mixture was stirred at 323 K for a certain period of time. All reactions were carried under Ar and the products were analysed by GC-MS measurement after quenching the excess amount of H<sub>2</sub>O<sub>2</sub> by addition of PPh<sub>3</sub> or <sup>1</sup>H NMR spectroscopy by using PhCN as internal standard.

4. Supplementary figure

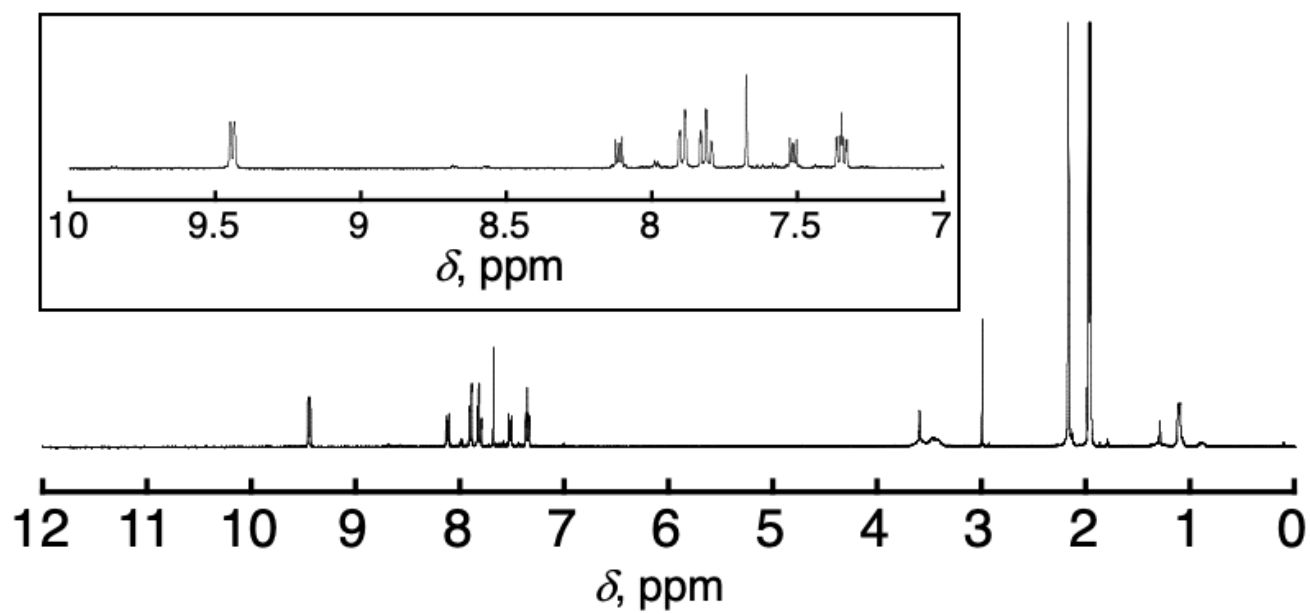

Fig. S1  $^1\text{H}$  NMR spectrum of  $\text{Fe}^{\text{II}}\text{-HNHC}\cdot(\text{PF}_6)_2$  in  $\text{CD}_3\text{CN}$ .

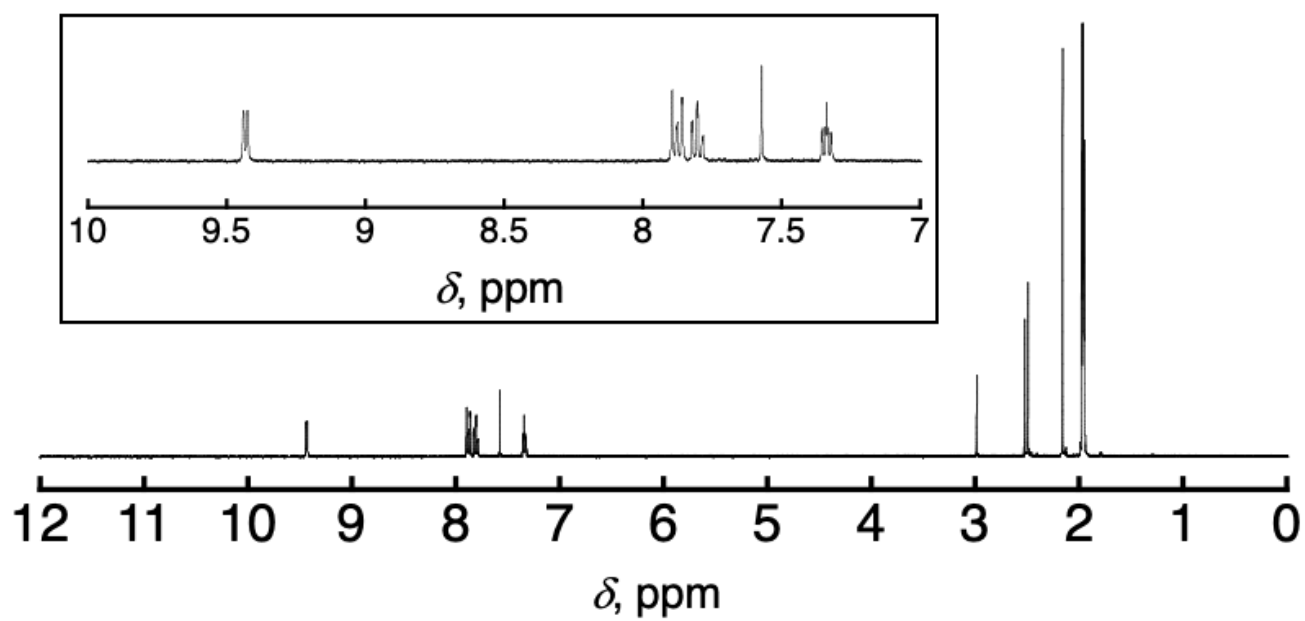

Fig. S2  $^1\text{H}$  NMR spectrum of  $\text{Fe-MeNHC}(\text{PF}_6)_2$  in  $\text{CD}_3\text{CN}$ .

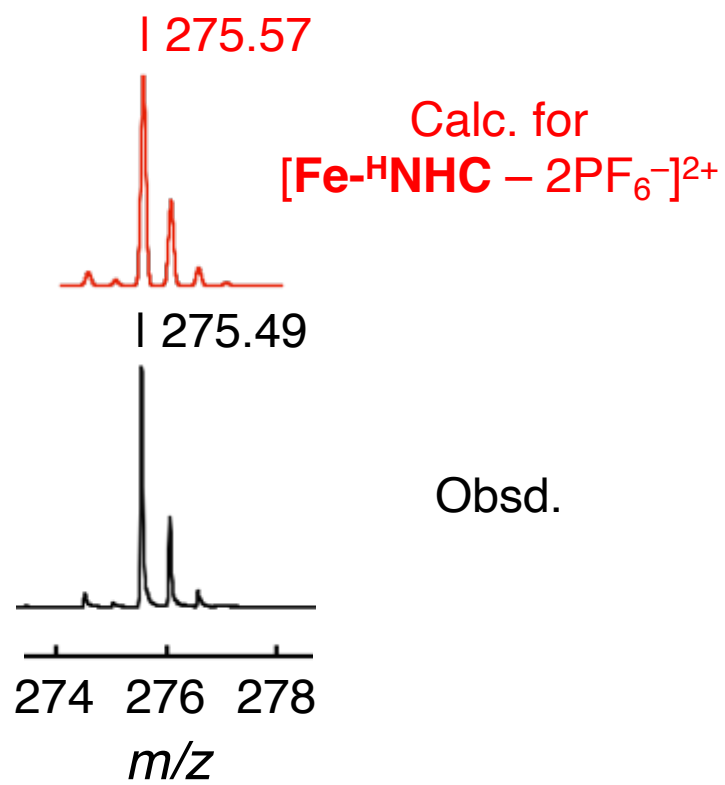

Fig. S3 ESI-TOF-MS spectrum of  $\text{Fe}^{\text{II}}\text{-HNHC}(\text{PF}_6)_2$  in  $\text{CH}_3\text{CN}$ .



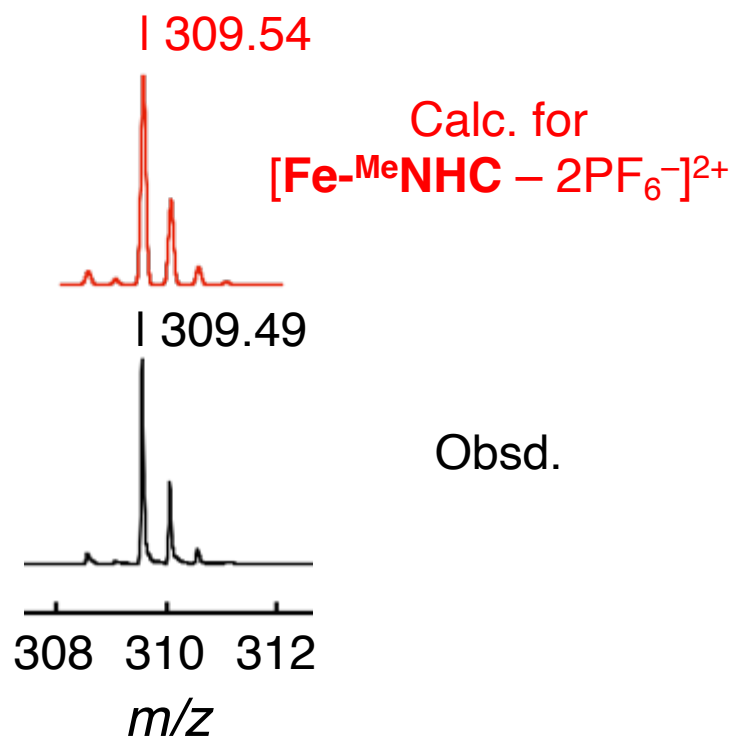

Fig. S4 ESI-TOF-MS spectrum of  $\text{Fe}^{\text{II}}\text{-MeNHC}\cdot(\text{PF}_6)_2$  in  $\text{CH}_3\text{CN}$ .

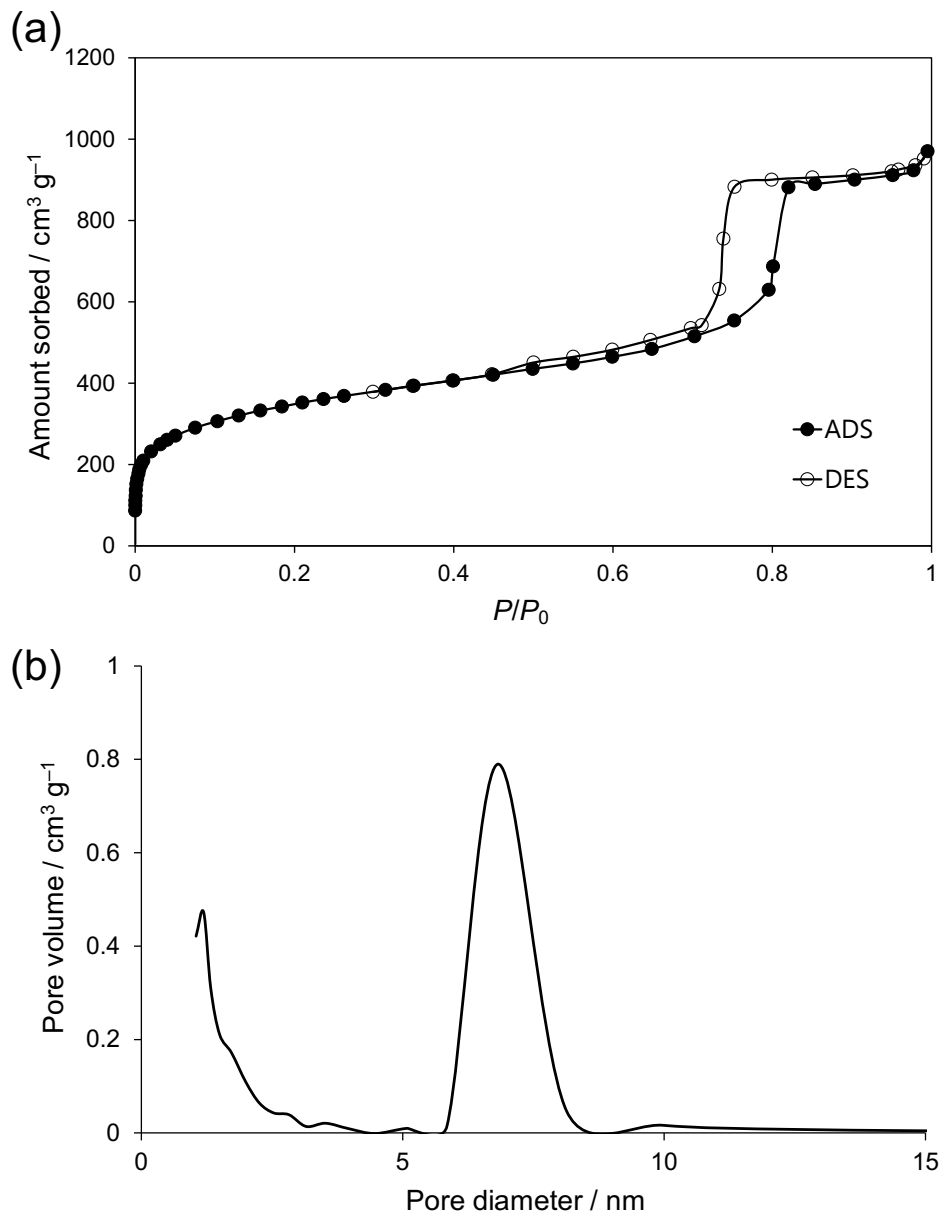

Fig. S5 (a)  $N_2$  adsorption-desorption isotherm of Al-SBA-15 at 77 K. Closed and open symbols indicate the adsorption and desorption branches, respectively. (b) Distribution of the pore diameters of Al-SBA-15.

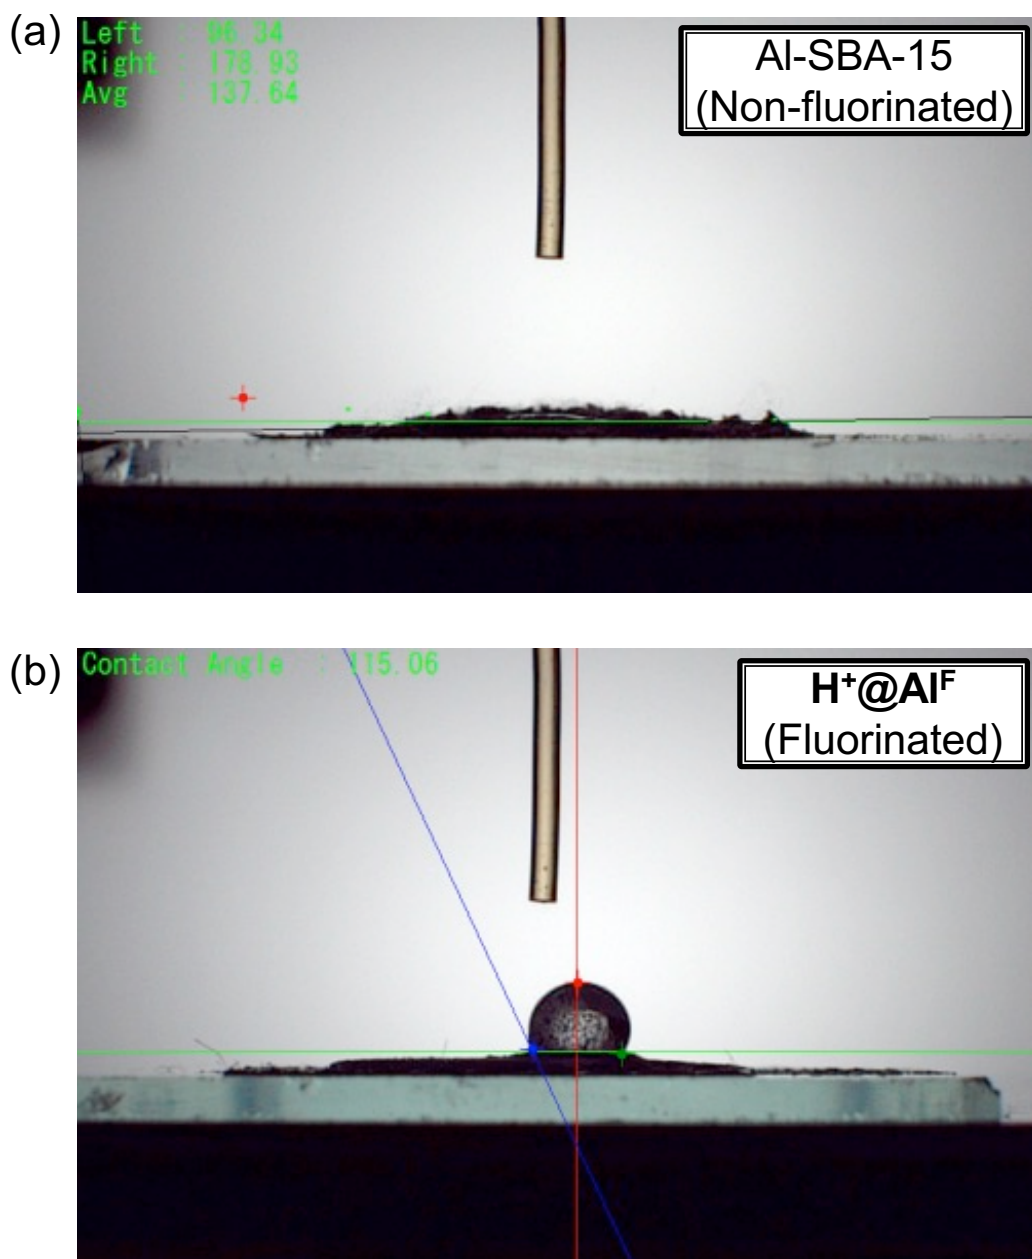

Fig. S6 Contact angles of the supports (a) Al-SBA-15. (b) H<sup>+</sup>@Al<sup>F</sup>.

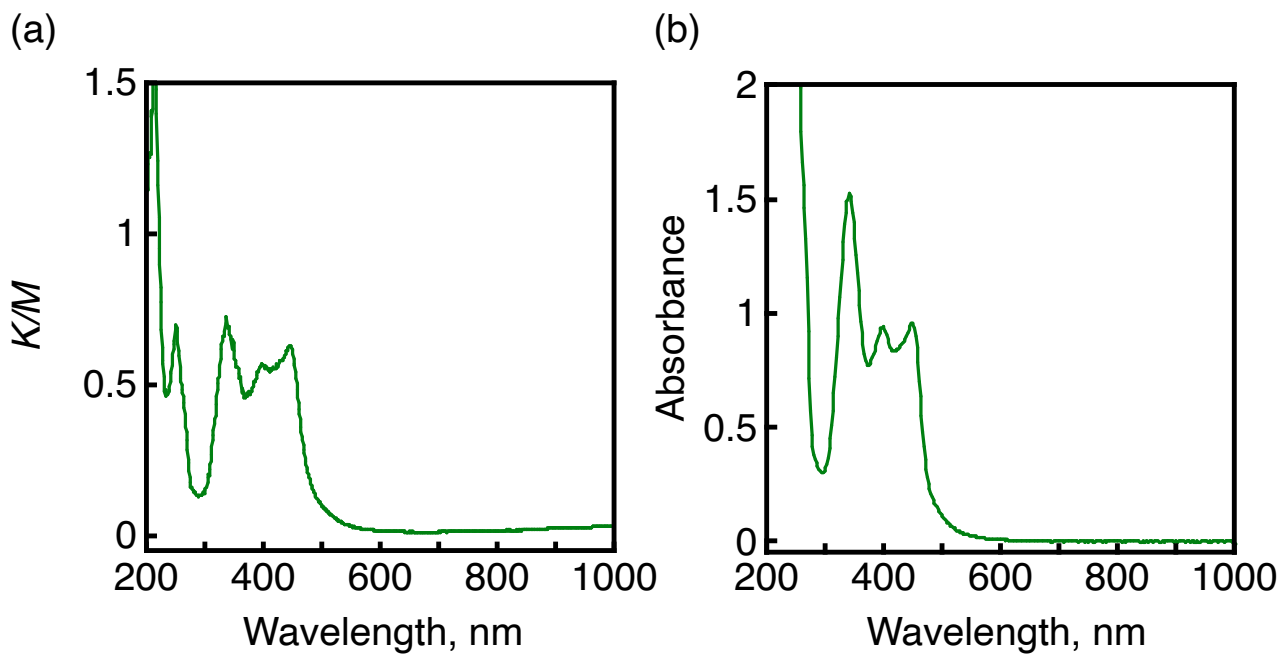

Fig. S7 (a) UV-vis-NIR reflectance spectrum of  $\text{Fe}^{\text{II}}\text{-ClNHC@Al}^{\text{F}}$ . (b) UV-vis-NIR spectrum of  $\text{Fe-ClNHC}\cdot(\text{PF}_6)_2$  in  $\text{CH}_3\text{CN}$ .

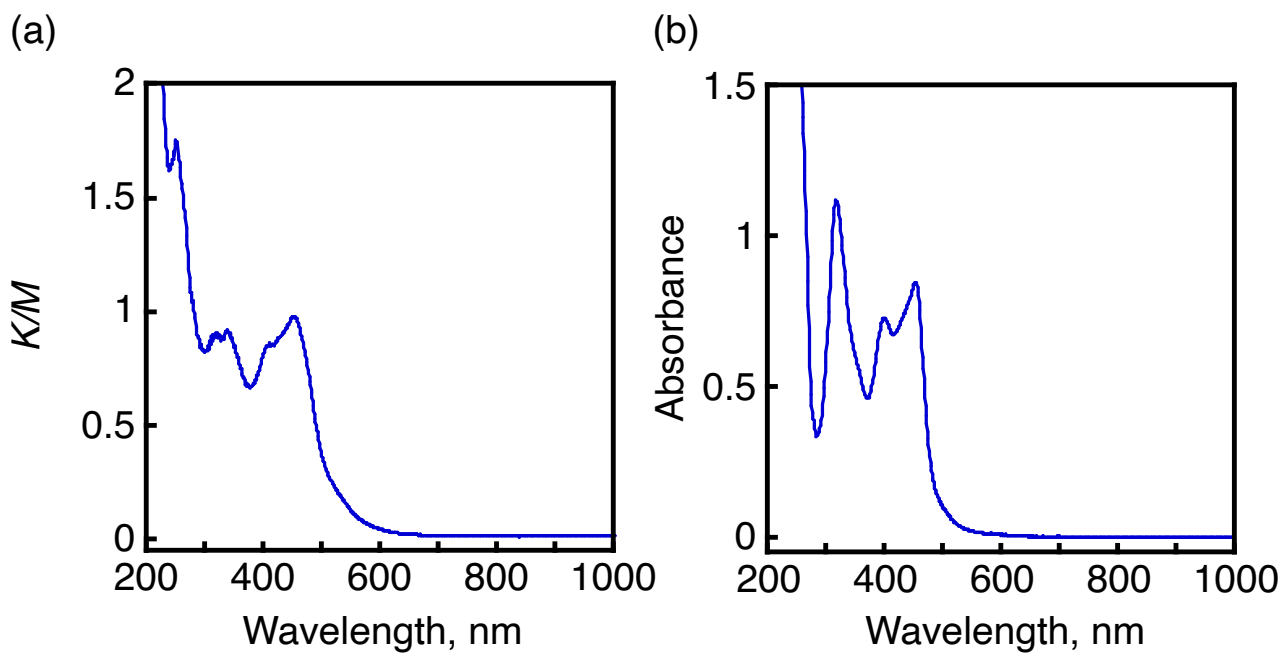

Fig. S8 (a) UV-vis-NIR reflectance spectrum of  $\text{Fe}^{\text{II}}\text{-HNHC@AlF}$ . (b) UV-vis-NIR spectrum of  $\text{Fe-HNHC}\cdot(\text{PF}_6)_2$  in  $\text{CH}_3\text{CN}$ .

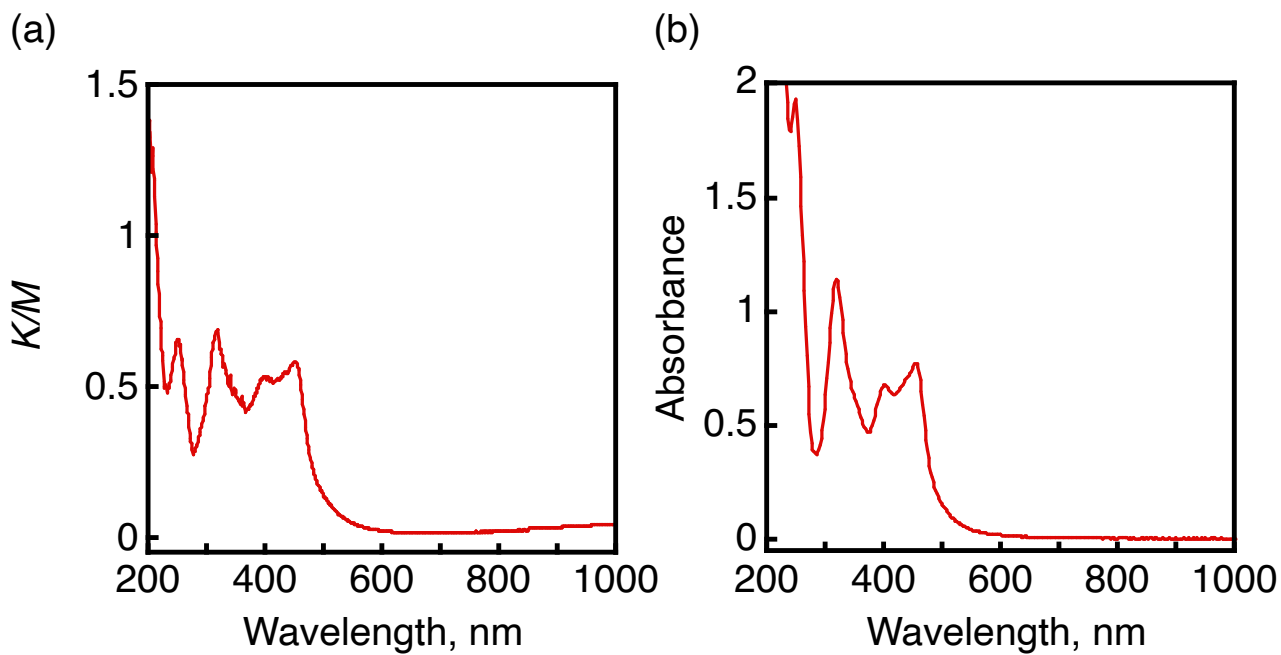

Fig. S9 (a) UV-vis-NIR reflectance spectrum of  $\text{Fe}^{\text{II}}\text{-MeNHC@AlF}$ . (b) UV-vis-NIR spectrum of  $\text{Fe}^{\text{-MeNHC}}\cdot(\text{PF}_6)_2$  in  $\text{CH}_3\text{CN}$ .

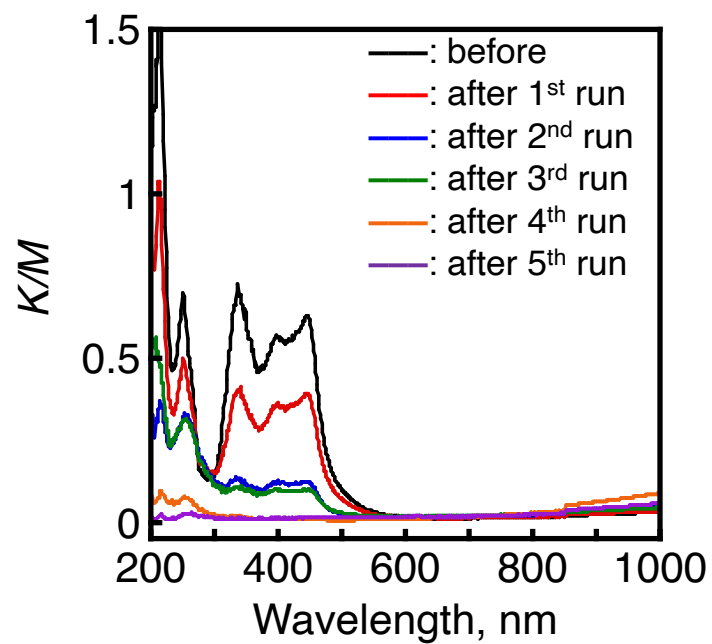

Fig. S10 UV-vis-NIR reflectance spectra after each catalytic run using Fe<sup>II</sup>-ClNHC@AlF. The summary of Fe contents calculated based on  $K/M$  ratio was depicted in Table S5.

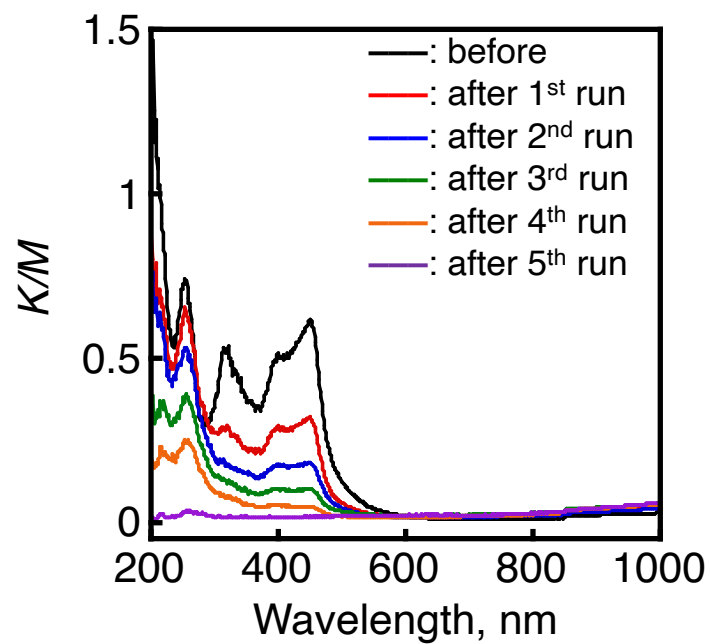

Fig. S11 UV-vis-NIR reflectance spectra after each catalytic run using Fe<sup>II</sup>-HNHC@Al<sup>F</sup>. The summary of Fe contents calculated based on  $K/M$  ratio was depicted in Table S6.



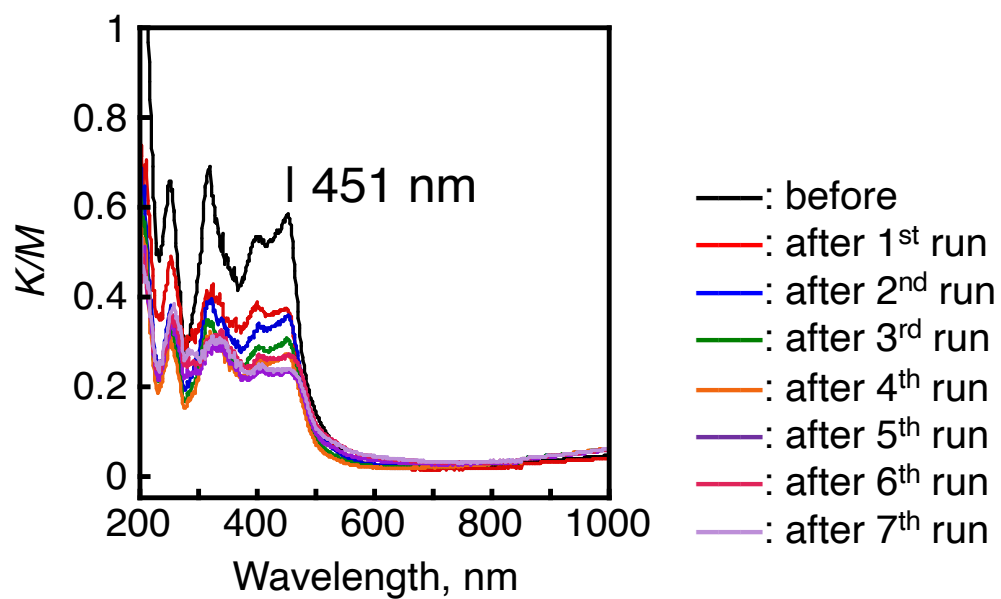

Fig. S12 UV-vis-NIR reflectance spectra after each catalytic run using  $\text{Fe}^{\text{II}}\text{-MeNHC@AlF}$ . The summary of Fe contents calculated based on  $K/M$  ratio was depicted in Table S7.

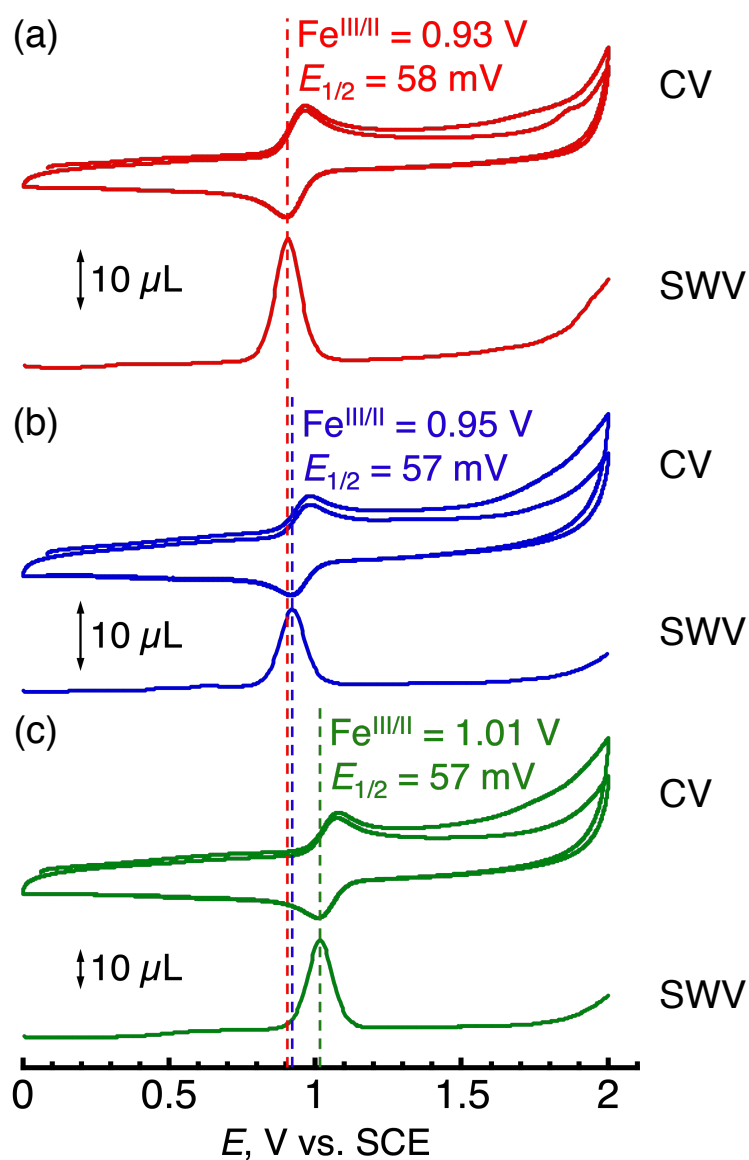

Fig. S13 Cyclic voltammograms (CVs) and square-wave voltammograms (SWVs) of  $\text{Fe}^{\text{II-MeNHC}}$  (a),  $\text{Fe}^{\text{II-HNHC}}$  (b), and  $\text{Fe}^{\text{II-ClNHC}}$  (c) in  $\text{CH}_3\text{CN}$  at room temperature. Conditions: [complex] = 0.1 mM, 0.1 M of  $[(n\text{-butyl})_4\text{N}]\text{PF}_6$  as an electrolyte; working electrode, glassy carbon; reference electrode, Ag/AgCl; counter electrode, Pt wire. Redox potentials are referenced to SCE as 0 V by subtracting 0.045 V from the potentials measured.

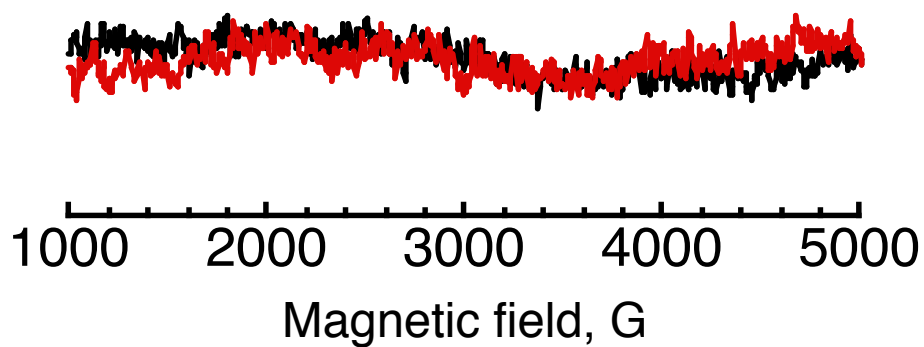

Fig. S14 X-band The ESR spectra of Fe<sup>II</sup>-ClNHC in acetonitrile before (black line) and after (red line) addition of 10 equiv. of H<sub>2</sub>O<sub>2</sub>. [Fe<sup>II</sup>-ClNHC] = 1 mM, [H<sub>2</sub>O<sub>2</sub>] = 10 mM. EPR spectra were measured at 100 K. Microwave frequency: 9.572 GHz, microwave power: 1.0 mW, modulation frequency: 100.00 kHz, modulation amplitude: 6.00 G.

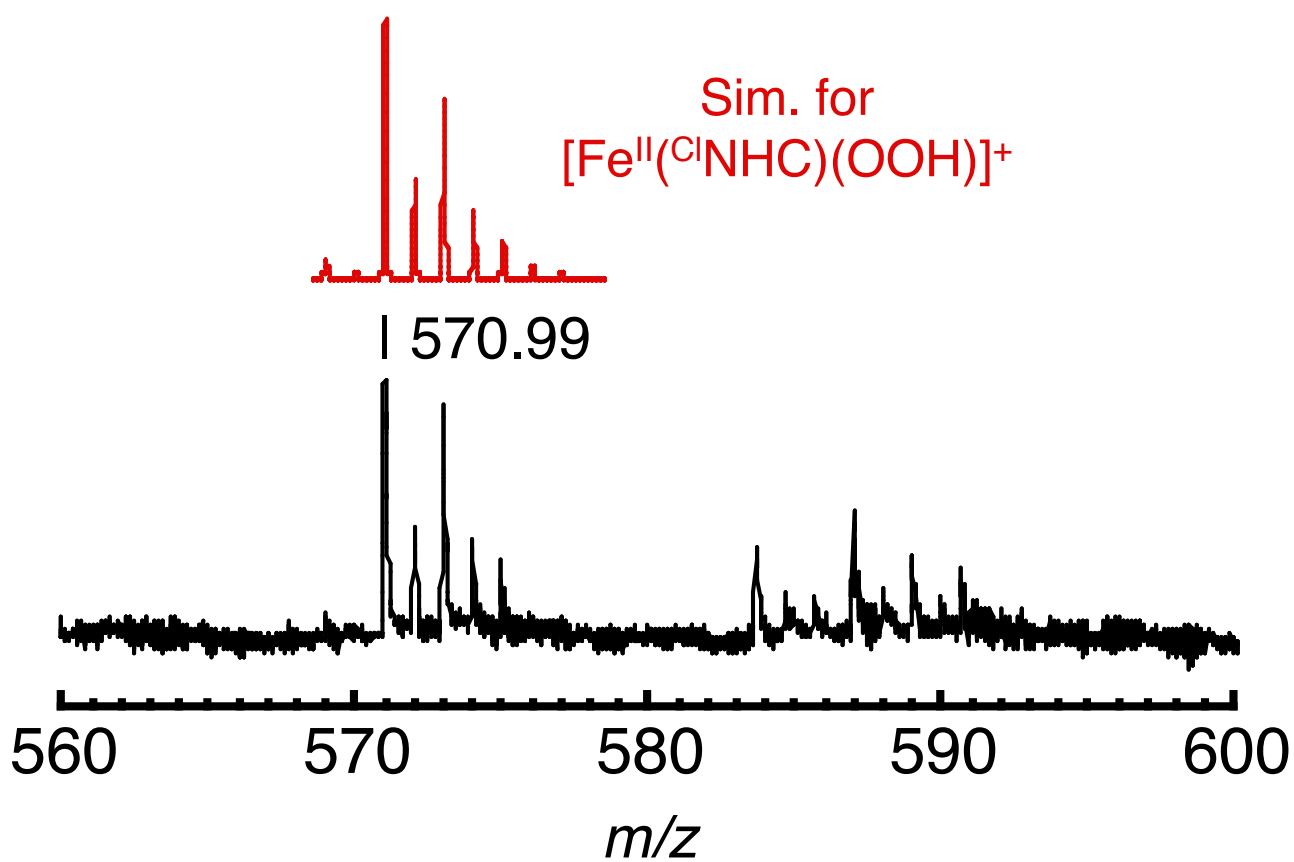

Fig. S15 ESI-MS spectrum of a reaction mixture containing  $\text{Fe}^{\text{II}}\text{-ClNHC}$  and 10 equiv. of  $\text{H}_2\text{O}_2$  in  $\text{CH}_3\text{CN}$ : black trace, observed; red trace, simulated for  $[\text{Fe}^{\text{II}}(\text{OOH})(\text{ClNHC})]^+$ .

## 5. Supplementary table

Table S1. Catalytic cyclohexane oxidation using H<sub>2</sub>O<sub>2</sub> as an oxidant and Fe<sup>II</sup>-Cl<sup>-</sup>NHC@Al<sup>F</sup> as a catalyst in acetonitrile or trifluoroethanol.

| Solvent          | Product | TONs <sup>a</sup> |
|------------------|---------|-------------------|
| Acetonitrile     | Cy-OH   | 705               |
|                  | Cy=O    | 39                |
| Trifluoroethanol | Cy-OH   | N.D.              |
|                  | Cy=O    | N.D.              |

<sup>a</sup> TONs = [Product]/[catalyst]. Conditions: Fe<sup>II</sup>-Cl<sup>-</sup>NHC@Al<sup>F</sup>: 10 nmol, [H<sub>2</sub>O<sub>2</sub>] = 16 mM, [Substrate] = 100 mM, T = 313 K, and reaction time = 3 h. TONs were determined by <sup>1</sup>H NMR and GC-MS analysis. N.D.: Not detected.

Table S2. Control experiments for the cyclohexane oxidation.

| Catalyst                                                             | Product | TONs <sup>a</sup> | Alcohol/Ketone |
|----------------------------------------------------------------------|---------|-------------------|----------------|
| <b>Fe<sup>II</sup>-<sup>Cl</sup>NHC•(PF<sub>6</sub>)<sub>2</sub></b> | Cy-OH   | 6                 | 1.1            |
|                                                                      | Cy=O    | 5                 |                |
| <b>Fe<sup>II</sup>-<sup>H</sup>NHC•(PF<sub>6</sub>)<sub>2</sub></b>  | Cy-OH   | 6                 | 1.5            |
|                                                                      | Cy=O    | 4                 |                |
| <b>Fe<sup>II</sup>-<sup>Me</sup>NHC•(PF<sub>6</sub>)<sub>2</sub></b> | Cy-OH   | 5                 | 1.8            |
|                                                                      | Cy=O    | 3                 |                |
| <b>H<sup>+</sup>@Al<sup>F</sup> (1.0 mg)</b>                         | Cy-OH   | N.D.              | –              |
|                                                                      | Cy=O    | N.D.              |                |

<sup>a</sup> TONs = [Product]/[catalyst]. Conditions: **[Fe<sup>II</sup>-<sup>R</sup>NHC•(PF<sub>6</sub>)<sub>2</sub>] = 0.01 mM**, [H<sub>2</sub>O<sub>2</sub>] = 16 mM, [Substrate] = 100 mM, *T* = 313 K, and reaction time = 3 h. TONs were determined by GC-MS analysis. Any byproducts other than compounds listed in the table were not observed. N.D.: Not detected.

Table S3. Catalytic substrate oxidation by H<sub>2</sub>O<sub>2</sub> and Fe<sup>II</sup>-Cl<sup>-</sup>NHC@Al<sup>F</sup> in acetonitrile.

| Substrate                           | BDE, kcal/mol <sup>a</sup> | Product                             | TONs <sup>b</sup> | A/K |
|-------------------------------------|----------------------------|-------------------------------------|-------------------|-----|
| Cumene                              | 83.5                       | Cumene-OH                           | 1430              | –   |
| Toluene                             | 88.5                       | benzylalcohol                       | 1100              | 20  |
|                                     |                            | benzaldehyde                        | 55                |     |
| Cyclooctane                         | 95.7                       | cyclooctanol                        | 820               | 23  |
|                                     |                            | cyclooctanone                       | 35                |     |
| <i>cis</i> -1,2-dimethylcyclohexane | 97.4                       | <i>cis</i> -1,2-dimethylcyclohexane | 420               | –   |

<sup>a</sup> ref. S5. <sup>b</sup> TONs = [Product]/[catalyst]. Conditions: Fe<sup>II</sup>-Cl<sup>-</sup>NHC•(PF<sub>6</sub>)<sub>2</sub>: 10 nmol, [H<sub>2</sub>O<sub>2</sub>] = 16 mM, [Substrate] = 100 mM, T = 313 K, and reaction time = 3 h. TONs were determined by <sup>1</sup>H NMR spectroscopy by using PhCN as internal standard. Any byproducts other than compounds listed in the table were not observed.

Table S4. Catalytic activity in oxidation of other substrates using H<sub>2</sub>O<sub>2</sub> and Fe<sup>II</sup>-ClNHC@Al<sup>F</sup> in acetonitrile.

| Substrate                                 | BDE, kcal/mol <sup>a</sup> | Product       | TONs <sup>b</sup> |
|-------------------------------------------|----------------------------|---------------|-------------------|
| Cyclohexanol<br>(100 mM)                  | 92.4                       | Cyclohexanone | 30                |
| Cyclooctane, cyclohexanol<br>(50 mM each) | 95.7, 92.4                 | Cyclooctanol  | 752               |
|                                           |                            | Cyclooctenone | 28                |
|                                           |                            | Cyclohexanone | 20                |

<sup>a</sup> ref. S5. <sup>b</sup> TONs = [Product]/[catalyst]. Conditions: Fe<sup>II</sup>-ClNHC•(PF<sub>6</sub>)<sub>2</sub>: 10 nmol, [H<sub>2</sub>O<sub>2</sub>] = 16 mM, T = 313 K, and reaction time = 3 h. TONs were determined by <sup>1</sup>H NMR spectroscopy by using PhCN as internal standard. Any byproducts other than compounds listed in the table were not observed.



Table S5. Summary of Fe contents calculated and total TONs in catalytic cyclohexane oxidation in acetonitrile by H<sub>2</sub>O<sub>2</sub> and Fe<sup>II</sup>-Cl<sup>-</sup>NHC@Al<sup>F</sup>

|                           | Fe contents, % <sup>a</sup> | Fe contents, nmol mg <sup>-1</sup> | Total TON <sup>b</sup> |
|---------------------------|-----------------------------|------------------------------------|------------------------|
| Before run                | 100                         | 7.3                                | –                      |
| After 1 <sup>st</sup> run | 61                          | 4.5                                | 744                    |
| After 2 <sup>nd</sup> run | 20                          | 1.5                                | 467                    |
| After 3 <sup>rd</sup> run | 16                          | 1.2                                | 297                    |
| After 4 <sup>th</sup> run | 2                           | 0.15                               | 85                     |
| After 5 <sup>th</sup> run | 0                           | 0                                  | N.D.                   |

<sup>a</sup> Fe contents, % =  $(K/M)_X / (K/M)_0 \times 100$  (X = number of catalytic runs).  $(K/M)_X$ : The  $K/M$  value at 451 nm determined by UV-vis-NIR reflectance measurement of the catalyst after the X-th catalytic run.  $(K/M)_0$ : The  $K/M$  value at 451 nm determined by UV-vis-NIR reflectance measurement of catalyst before reaction. <sup>b</sup> Total TON = [All products]/[catalyst]. Conditions: [H<sub>2</sub>O<sub>2</sub>] = 16 mM, [Substrate] = 100 mM, T = 313 K, and reaction time = 3 h. N.D.: not detected.

Table S6. Summary of Fe contents calculated and total TONs in catalytic cyclohexane oxidation in acetonitrile by H<sub>2</sub>O<sub>2</sub> and Fe<sup>II</sup>-<sup>H</sup>NHC@Al<sup>F</sup>

|                           | Fe contents, % <sup>a</sup> | Fe contents, nmol mg <sup>-1</sup> | Total TON <sup>b</sup> |
|---------------------------|-----------------------------|------------------------------------|------------------------|
| Before run                | 0                           | 16                                 | –                      |
| After 1 <sup>st</sup> run | 51                          | 8.2                                | 511                    |
| After 2 <sup>nd</sup> run | 30                          | 4.8                                | 326                    |
| After 3 <sup>rd</sup> run | 17                          | 2.7                                | 209                    |
| After 4 <sup>th</sup> run | 8                           | 1.3                                | 103                    |
| After 5 <sup>th</sup> run | 0                           | 0                                  | N.D.                   |

<sup>a</sup> Fe contents, % =  $(K/M)_X / (K/M)_0 \times 100$  (X = number of catalytic runs).  $(K/M)_X$ : The  $K/M$  value at 451 nm determined by UV-vis-NIR reflectance measurement of the catalyst after the X-th catalytic run.  $(K/M)_0$ : The  $K/M$  value at 451 nm determined by UV-vis-NIR reflectance measurement of catalyst before reaction. <sup>b</sup> Total TON = [All products]/[catalyst]. Conditions: [H<sub>2</sub>O<sub>2</sub>] = 16 mM, [substrate] = 100 mM,  $T = 313$  K, and reaction time = 3 h. N.D.: not detected.

Table S7. Summary of Fe contents calculated and total TONs in catalytic cyclohexane oxidation in acetonitrile by H<sub>2</sub>O<sub>2</sub> and Fe<sup>II</sup>-MeNHC@Al<sup>F</sup>

|                            | Fe contents, % <sup>a</sup> | Fe contents, nmol mg <sup>-1</sup> | Total TON <sup>b</sup> |
|----------------------------|-----------------------------|------------------------------------|------------------------|
| Before run                 | 100                         | 23                                 | –                      |
| After 1 <sup>st</sup> run  | 64                          | 15                                 | 379                    |
| After 2 <sup>nd</sup> run  | 61                          | 14                                 | 337                    |
| After 3 <sup>rd</sup> run  | 52                          | 12                                 | 422                    |
| After 4 <sup>th</sup> run  | 46                          | 11                                 | 366                    |
| After 5 <sup>th</sup> run  | 43                          | 9.9                                | 314                    |
| After 6 <sup>th</sup> run  | 46                          | 10                                 | 316                    |
| After 7 <sup>th</sup> run  | 41                          | 9.4                                | 352                    |
| After 8 <sup>th</sup> run  | 25                          | 5.8                                | 237                    |
| After 9 <sup>th</sup> run  | 21                          | 4.8                                | 151                    |
| After 10 <sup>th</sup> run | 0                           | 0                                  | N.D.                   |

<sup>a</sup> Fe contents, % =  $(K/M)_X / (K/M)_0 \times 100$  (X = number of catalytic runs).  $(K/M)_X$ : The  $K/M$  value at 451 nm determined by UV-vis-NIR reflectance measurement of the catalyst after the X-th catalytic run.  $(K/M)_0$ : The  $K/M$  value at 451 nm determined by UV-vis-NIR reflectance measurement of catalyst before reaction. <sup>b</sup> Total TON = [All products]/[catalyst]. Conditions: [H<sub>2</sub>O<sub>2</sub>] = 16 mM, [substrate] = 100 mM,  $T = 313$  K, and reaction time = 3 h. N.D.: not detected.

Table S8. Control experiments for cyclohexene oxidation.

| Catalyst                                                             | Product    | TONs <sup>a</sup> | Cyen-oxide/<br>(Cyen-OH + Cyen=O) |
|----------------------------------------------------------------------|------------|-------------------|-----------------------------------|
| <b>Fe<sup>II</sup>-ClNHC•(PF<sub>6</sub>)<sub>2</sub></b>            | Cyen-OH    | 9                 | 1.1                               |
|                                                                      | Cyen=O     | 6                 |                                   |
|                                                                      | Cyen-oxide | 15                |                                   |
| <b>Fe<sup>II</sup>-<sup>H</sup>NHC•(PF<sub>6</sub>)<sub>2</sub></b>  | Cyen-OH    | 8                 | 0.86                              |
|                                                                      | Cyen=O     | 6                 |                                   |
|                                                                      | Cyen-oxide | 12                |                                   |
| <b>Fe<sup>II</sup>-<sup>Me</sup>NHC•(PF<sub>6</sub>)<sub>2</sub></b> | Cyen-OH    | 8                 | 0.67                              |
|                                                                      | Cyen=O     | 7                 |                                   |
|                                                                      | Cyen-oxide | 10                |                                   |
| <b>H<sup>+</sup>@Al<sup>F</sup> (1.0 mg)</b>                         | Cyen-OH    | N.D.              | –                                 |
|                                                                      | Cyen=O     | N.D.              |                                   |
|                                                                      | Cyen-oxide | N.D.              |                                   |

<sup>a</sup> TONs = [Product]/[catalyst]. Conditions: catalyst: 10 nmol, [H<sub>2</sub>O<sub>2</sub>] = 16 mM, [Substrate] = 100 mM, *T* = 313 K, and reaction time = 3 h. TONs were determined by GC-MS analysis. Any byproducts other than compounds listed in the table were not observed. N.D.: Not detected.

Table S9. Comparison of cyclohexane hydroxylation and cyclohexene epoxidation with H<sub>2</sub>O<sub>2</sub> as an oxidant among selected literature.

| Catalyst                                                                                 | Substrate | TON (time)        | A/K | Epoxide yield, % | Ref.      |
|------------------------------------------------------------------------------------------|-----------|-------------------|-----|------------------|-----------|
| <b>Fe<sup>II</sup>-Cl<sup>-</sup>NHC@Al<sup>F</sup></b>                                  | CyH       | 744<br>(3 hours)  | 18  | –                | This work |
| [Fe <sup>II</sup> (TPA)(CH <sub>3</sub> CN) <sub>2</sub> ] <sup>2+</sup>                 | CyH       | 3.0<br>(15 min)   | 4.3 | –                | S6        |
| [Fe <sup>II</sup> (BPMEN)(CH <sub>3</sub> CN) <sub>2</sub> ] <sup>2+</sup>               | CyH       | 6.3<br>(30 min)   | 8.0 | –                | S7        |
| [Fe <sup>II</sup> (BPQA)(OTf) <sub>2</sub> ]                                             | CyH       | 5.8<br>(30 min)   | 10  | –                | S7        |
| [Fe <sup>II</sup> (BQPA)(H <sub>2</sub> O)(ClO <sub>4</sub> ) <sup>+</sup>               | CyH       | 1.7<br>(30 min)   | 2   | –                | S7        |
| Fe <sup>II</sup> (Me <sub>2</sub> PyTACN)(CF <sub>3</sub> SO <sub>3</sub> ) <sub>2</sub> | CyH       | 6.0<br>(30 min)   | 12  | –                | S8        |
| <b>Fe<sup>II</sup>-Cl<sup>-</sup>NHC@Al<sup>F</sup></b>                                  | Cyene     | 908<br>(3 hours)  | –   | 90               | This work |
| Fe <sup>II</sup> (cyclam)(CF <sub>3</sub> SO <sub>3</sub> ) <sub>2</sub>                 | Cyene     | 20<br>(20 min)    | –   | 40               | S9        |
| [Fe(PYBP)(CH <sub>3</sub> CN) <sub>2</sub> ] <sup>2+</sup>                               | Cyene     | 490<br>(5–10 min) | –   | 94               | S10       |
| [Fe <sup>II</sup> (NCCN <sup>Me</sup> )(MeCN) <sub>2</sub> ] <sup>2+</sup>               | Cyene     | 45<br>(5 min)     | –   | 90               | S11       |
| [Fe <sup>III</sup> (calix[4]imidazolyl)(CH <sub>3</sub> CN) <sub>2</sub> ] <sup>3+</sup> | Cyene     | 341<br>(30 min)   | –   | >99              | S12       |

TPA: tris(2-pyridylmethyl)amine, BPMN: *N,N'*-dimethyl-*N,N'*-bis(2-pyridylmethyl)-1,2-diaminoethane, BPQA: bis(2-pyridylmethyl)(2-quinolylmethyl)amine, BQPA: bis(2-quinolylmethyl)(2-pyridylmethyl)amine, Me<sub>2</sub>PyTACN: 1-(2-pyridylmethyl)-4,7-dimethyl-1,4,7-triazacyclononane, cyclam: 1,4,8,11-tetraazacyclotetradecane, PYBP: 1,1'-bis-(pyridine-2-ylmethyl)-2,2'-bipiperidine NCCN<sup>Me</sup>: di(*o*-imidazol-2-ylidenepyridine)methane.

## References

- S1. H. Fujisaki, T. Ishizuka, Y. Shimoyama, H. Kotani, Y. Shiota, K. Yoshizawa and T. Kojima, *Chem. Commun.*, 2020, **56**, 9783.
- S2. N. V. Krishna and P. Selvam, *Chem. Eur. J.*, 2017, **23**, 1604.
- S3. O. Happel and A. Seubert, *J. Chromatogr. A.*, 2006, **1108**, 68.
- S4. J. Nakazawa, Y. Doi, S. Hikichi, *Mol. Catal.*, 2017, **443**, 14.
- S5. Y.-R. Luo, *Handbook of Bond Dissociation Energies in Organic Compounds*, 1st ed.; CRC Press LLC: Boca Raton, FL, 2003.
- S6. C. Kim, K. Chen, J. Kim, L. Que, Jr., *J. Am. Chem. Soc.*, 1997, **119**, 5964.
- S7. K. Chen, L. Que, Jr., *J. Am. Chem. Soc.* 2001, **123**, 6327.
- S8. A. Company, L. Gómez, M. Güell, X. Ribas, J. M. Luis, L. Que, Jr., M. Costas, *J. Am. Chem. Soc.*, 2007, **129**, 15766.
- S9. W. Nam, R. Ho, J. S. Valentine, *J. Am. Chem. Soc.*, 1991, **113**, 7052.
- S10. E. A. Mikhalyova, O. V. Makhlynets, T. D. Palluccio, A. S. Filatov, E. V. Rybak-Akimova, *Chem. Commun.*, 2012, **48**, 687.
- S11. J. W. Kück, A. Raba, I. I. E. Markovits, M. Cokoja and F. E. Kühn, *ChemCatChem*, 2014, **6**, 1882.
- S12. J. W. Kück, M. R. Anneser, B. Hofmann, A. Pöthig, M. Cokoja, F. E. Kühn, *ChemSusChem*, 2015, **8**, 4056.
